# Supplementary material for: Epidemiological Analysis of Diabetes-Related Hospitalization in Poland before and during the COVID-19 Pandemic, 2014–2020
Source: MDPI journal article supplement (doi:10.3390/ijerph191610030), 2022-08-14
Supplement: s1 [file s1]

## Supplementary material

### “Epidemiological analysis of diabetes-related hospitalization in Poland before and during the COVID-19 pandemic, 2014-2020”

Kuba Sękowski <sup>1,\*</sup>, Justyna Grudziąż-Sękowska <sup>1</sup>, Paweł Goryński <sup>2</sup>, Jarosław Pinkas <sup>1</sup> and Mateusz Jankowski <sup>1</sup>

<sup>1</sup> School of Public Health, Centre of Postgraduate Medical Education, 01-826 Warsaw, Poland

<sup>2</sup> Department of Population Health Monitoring and Analysis, National Institute of Public Health - National Institute of Hygiene, 00-791 Warsaw, Poland

\* Correspondence kuba.sekowski@gmail.com

**Supplementary Table S1.** Diabetes-related hospitalizations in Poland between 2014-2019 – crude numbers

| Type of diabetes mellitus | 2014<br>n=75476 |       |       |       |         |       | 2015<br>n=74826 |       |       |       |         |       | 2016<br>n=76220 |       |       |       |         |       | 2017<br>n=74670 |       |       |       |         |       |
|---------------------------|-----------------|-------|-------|-------|---------|-------|-----------------|-------|-------|-------|---------|-------|-----------------|-------|-------|-------|---------|-------|-----------------|-------|-------|-------|---------|-------|
|                           | Overall         |       | Males |       | Females |       | Overall         |       | Males |       | Females |       | Overall         |       | Males |       | Females |       | Overall         |       | Males |       | Females |       |
|                           | n               | rate  | n     | rate  | n       | rate  | n               | rate  | n     | rate  | n       | rate  | n               | rate  | n     | rate  | n       | rate  | n               | rate  | n     | rate  | n       | rate  |
| Overall                   | 75476           | 196.2 | 38271 | 205.5 | 37205   | 187.3 | 74826           | 194.7 | 38390 | 206.4 | 36436   | 183.7 | 76220           | 198.3 | 39314 | 211.4 | 36906   | 186.0 | 74670           | 194.3 | 39018 | 209.9 | 35652   | 179.7 |
| E10                       | 30931           | 80.4  | 16610 | 89.2  | 14321   | 72.1  | 28890           | 75.2  | 15559 | 83.7  | 13331   | 67.2  | 30027           | 78.1  | 16274 | 87.5  | 13753   | 69.3  | 30351           | 79.0  | 16621 | 89.4  | 13730   | 69.2  |
| E11                       | 41275           | 107.3 | 19741 | 106.0 | 21534   | 108.4 | 42599           | 110.8 | 20849 | 112.1 | 21750   | 109.6 | 42821           | 111.4 | 21001 | 113.0 | 21820   | 110.0 | 40722           | 106.0 | 20220 | 108.7 | 20502   | 103.3 |
| E13                       | 1714            | 4.5   | 1026  | 5.5   | 688     | 3.5   | 1805            | 4.7   | 1089  | 5.9   | 716     | 3.6   | 1749            | 4.6   | 1084  | 5.8   | 665     | 3.4   | 1730            | 4.5   | 1071  | 5.8   | 659     | 3.3   |
| E14                       | 1556            | 4.0   | 894   | 4.8   | 662     | 3.3   | 1532            | 4.0   | 893   | 4.8   | 639     | 3.2   | 1623            | 4.2   | 955   | 5.1   | 668     | 3.4   | 1867            | 4.9   | 1106  | 5.9   | 761     | 3.8   |

| Type of diabetes mellitus | 2018<br>n=72188 |       |       |       |         |       | 2019<br>n=68906 |       |       |       |         |       | 2020<br>n=45159 |       |       |       |         |       | Percentage difference<br>2019-2020 |       |       |       |         |       |
|---------------------------|-----------------|-------|-------|-------|---------|-------|-----------------|-------|-------|-------|---------|-------|-----------------|-------|-------|-------|---------|-------|------------------------------------|-------|-------|-------|---------|-------|
|                           | Overall         |       | Males |       | Females |       | Overall         |       | Males |       | Females |       | Overall         |       | Males |       | Females |       | Overall                            |       | Males |       | Females |       |
|                           | n               | rate  | n     | rate  | n       | rate  | n               | rate  | n     | rate  | n       | rate  | n               | rate  | n     | rate  | n       | rate  | n                                  | rate  | n     | rate  | n       | rate  |
| Overall                   | 72188           | 187.9 | 38132 | 205.2 | 34056   | 171.7 | 68906           | 179.5 | 36464 | 196.4 | 32442   | 163.7 | 45159           | 118.0 | 24857 | 134.3 | 20302   | 102.7 | -34.5                              | -34.2 | -31.8 | -31.6 | -37.4   | -37.2 |
| E10                       | 28584           | 74.4  | 15967 | 85.9  | 12617   | 63.6  | 28617           | 74.6  | 15852 | 85.4  | 12765   | 64.4  | 20282           | 53.0  | 11573 | 62.5  | 8709    | 44.1  | -29.1                              | -28.9 | -27.0 | -26.7 | -31.8   | -31.6 |
| E11                       | 39904           | 103.9 | 19961 | 107.4 | 19943   | 100.6 | 38138           | 99.4  | 19322 | 104.1 | 18816   | 95.0  | 23568           | 61.6  | 12484 | 67.5  | 11084   | 56.1  | -38.2                              | -38.0 | -35.4 | -35.2 | -41.1   | -40.9 |
| E13                       | 1663            | 4.3   | 1048  | 5.6   | 615     | 3.1   | 173             | 0.5   | 114   | 0.6   | 59      | 0.3   | 107             | 0.3   | 70    | 0.4   | 37      | 0.2   | -38.2                              | -38.0 | -38.6 | -38.4 | -37.3   | -37.1 |
| E14                       | 2037            | 5.3   | 1156  | 6.2   | 881     | 4.4   | 1978            | 5.2   | 1176  | 6.3   | 802     | 4.0   | 1202            | 3.1   | 730   | 3.9   | 472     | 2.4   | -39.2                              | -39.0 | -37.9 | -37.7 | -41.1   | -41.0 |

Abbreviation: rate - number of diabetes-related hospitalizations per 100.000 inhabitants

**Supplementary Table S2.** Demographic characteristics of patients hospitalized with type 1 diabetes in Poland between 2014-2019 – crude numbers and rates by age groups.

| Age group | 2014    |       |         |       |         |       | 2015    |       |         |       |         |       | 2016    |       |         |       |         |       | 2017    |       |         |       |         |       |
|-----------|---------|-------|---------|-------|---------|-------|---------|-------|---------|-------|---------|-------|---------|-------|---------|-------|---------|-------|---------|-------|---------|-------|---------|-------|
|           | Overall |       | Males   |       | Females |       | Overall |       | Males   |       | Females |       | Overall |       | Males   |       | Females |       | Overall |       | Males   |       | Females |       |
|           | n=30931 |       | n=16610 |       | n=14321 |       | n=28890 |       | n=15559 |       | n=13331 |       | n=30027 |       | n=16274 |       | n=13753 |       | n=30351 |       | n=16621 |       | n=13730 |       |
|           | n       | rate  |
| 0-9       | 2147    | 54.3  | 1089    | 53.6  | 1058    | 54.9  | 1939    | 49.0  | 969     | 47.7  | 970     | 50.4  | 2276    | 57.5  | 1163    | 57.2  | 1113    | 57.8  | 2417    | 61.0  | 1247    | 61.3  | 1170    | 60.7  |
| 10-19     | 5136    | 133.6 | 2568    | 130.3 | 2568    | 137.0 | 4592    | 121.6 | 2305    | 119.1 | 2287    | 124.3 | 5300    | 142.0 | 2697    | 140.9 | 2603    | 143.1 | 6200    | 166.3 | 3151    | 164.8 | 3049    | 167.9 |
| 20-29     | 2135    | 39.2  | 1080    | 38.9  | 1055    | 39.4  | 2272    | 43.3  | 1244    | 46.6  | 1028    | 39.9  | 2322    | 45.9  | 1198    | 46.5  | 1124    | 45.3  | 2148    | 43.9  | 1113    | 44.7  | 1035    | 43.1  |
| 30-39     | 2465    | 39.0  | 1521    | 47.5  | 944     | 30.3  | 2550    | 40.2  | 1619    | 50.3  | 931     | 29.7  | 2506    | 39.6  | 1559    | 48.6  | 947     | 30.3  | 2443    | 38.8  | 1508    | 47.3  | 935     | 30.1  |
| 40-49     | 2587    | 52.2  | 1706    | 68.4  | 881     | 35.8  | 2577    | 50.9  | 1642    | 64.4  | 935     | 37.2  | 2503    | 48.1  | 1654    | 63.2  | 849     | 32.8  | 2616    | 49.0  | 1722    | 64.1  | 894     | 33.7  |
| 50-59     | 4311    | 79.7  | 2840    | 107.8 | 1471    | 53.1  | 3674    | 70.0  | 2377    | 92.8  | 1297    | 48.3  | 3516    | 69.1  | 2294    | 92.2  | 1222    | 47.0  | 3308    | 67.1  | 2188    | 90.7  | 1120    | 44.5  |
| 60-69     | 5501    | 118.5 | 3261    | 154.1 | 2240    | 88.7  | 5226    | 106.9 | 3013    | 135.0 | 2213    | 83.3  | 5441    | 108.3 | 3273    | 142.4 | 2168    | 79.5  | 5079    | 99.1  | 3154    | 134.3 | 1925    | 69.3  |
| 70-79     | 3918    | 164.9 | 1667    | 178.8 | 2251    | 155.9 | 3501    | 149.1 | 1535    | 165.9 | 1966    | 138.2 | 3561    | 147.2 | 1582    | 164.5 | 1979    | 135.8 | 3619    | 143.4 | 1675    | 165.4 | 1944    | 128.6 |
| 80+       | 2731    | 178.6 | 878     | 187.9 | 1853    | 174.5 | 2559    | 163.3 | 855     | 177.8 | 1704    | 156.9 | 2602    | 161.4 | 854     | 171.9 | 1748    | 156.7 | 2521    | 153.5 | 863     | 169.9 | 1658    | 146.1 |

| Age group | 2018    |       |         |       |         |       | 2019    |       |         |       |         |       | 2020    |       |         |       |         |       | Percentage difference (2019-2020) |       |       |       |         |       |
|-----------|---------|-------|---------|-------|---------|-------|---------|-------|---------|-------|---------|-------|---------|-------|---------|-------|---------|-------|-----------------------------------|-------|-------|-------|---------|-------|
|           | Overall |       | Males   |       | Females |       | Overall |       | Males   |       | Females |       | Overall |       | Males   |       | Females |       | Overall                           |       | Males |       | Females |       |
|           | n=28584 |       | n=15967 |       | n=12617 |       | n=28617 |       | n=15852 |       | n=12765 |       | n=20282 |       | n=11573 |       | n=8709  |       | n                                 | rate  | n     | rate  | n       | rate  |
|           | n       | rate  | n                                 | rate  | n     | rate  | n       | rate  |
| 0-9       | 2303    | 58.7  | 1191    | 59.1  | 1112    | 58.3  | 2335    | 60.4  | 1233    | 62.0  | 1102    | 58.6  | 1775    | 46.6  | 920     | 47.0  | 855     | 46.1  | -24.0                             | -22.9 | -25.4 | -24.3 | -22.4   | -21.3 |
| 10-19     | 5975    | 158.6 | 3057    | 158.3 | 2918    | 158.9 | 6411    | 167.8 | 3216    | 164.2 | 3195    | 171.5 | 4502    | 116.6 | 2297    | 116.1 | 2205    | 117.2 | -29.8                             | -30.5 | -28.6 | -29.3 | -31.0   | -31.7 |
| 20-29     | 2000    | 42.4  | 1146    | 47.7  | 854     | 37.0  | 2061    | 45.4  | 1101    | 47.6  | 960     | 43.1  | 1245    | 28.5  | 694     | 31.1  | 551     | 25.7  | -39.6                             | -37.3 | -37.0 | -34.5 | -42.6   | -40.4 |
| 30-39     | 2558    | 41.0  | 1570    | 49.7  | 988     | 32.1  | 2489    | 40.5  | 1566    | 50.3  | 923     | 30.4  | 1517    | 25.1  | 994     | 32.5  | 523     | 17.5  | -39.1                             | -38.1 | -36.5 | -35.5 | -43.3   | -42.4 |
| 40-49     | 2335    | 42.6  | 1608    | 58.3  | 727     | 26.7  | 2419    | 42.9  | 1637    | 57.7  | 782     | 28.0  | 1695    | 29.4  | 1192    | 41.1  | 503     | 17.6  | -29.9                             | -31.6 | -27.2 | -28.9 | -35.7   | -37.2 |
| 50-59     | 2942    | 61.5  | 1989    | 84.8  | 953     | 39.1  | 2862    | 61.3  | 1939    | 84.6  | 923     | 38.8  | 1940    | 42.1  | 1299    | 57.4  | 641     | 27.4  | -32.2                             | -31.3 | -33.0 | -32.2 | -30.6   | -29.5 |
| 60-69     | 4713    | 90.8  | 2971    | 124.8 | 1742    | 62.0  | 4657    | 89.2  | 2826    | 117.8 | 1831    | 64.9  | 3450    | 66.5  | 2284    | 95.8  | 1166    | 41.6  | -25.9                             | -25.4 | -19.2 | -18.7 | -36.3   | -35.9 |
| 70-79     | 3436    | 129.5 | 1617    | 150.5 | 1819    | 115.2 | 3260    | 116.7 | 1587    | 139.3 | 1673    | 101.2 | 2579    | 88.0  | 1317    | 109.7 | 1262    | 72.9  | -20.9                             | -24.6 | -17.0 | -21.2 | -24.6   | -27.9 |
| 80+       | 2322    | 139.4 | 818     | 158.3 | 1504    | 130.9 | 2123    | 125.5 | 747     | 141.8 | 1376    | 118.1 | 1579    | 93.8  | 576     | 110.3 | 1003    | 86.3  | -25.6                             | -25.3 | -22.9 | -22.2 | -27.1   | -26.9 |

**Supplementary Table S3.** Demographic characteristics of patients hospitalized with type 2 diabetes in Poland between 2014-2019 – crude numbers and rates by age groups.

| Age group | 2014    |       |         |       |         |       | 2015    |       |         |       |         |       | 2016    |       |         |       |         |       | 2017    |       |         |       |         |       |
|-----------|---------|-------|---------|-------|---------|-------|---------|-------|---------|-------|---------|-------|---------|-------|---------|-------|---------|-------|---------|-------|---------|-------|---------|-------|
|           | Overall |       | Males   |       | Females |       | Overall |       | Males   |       | Females |       | Overall |       | Males   |       | Females |       | Overall |       | Males   |       | Females |       |
|           | n=41275 |       | n=19741 |       | n=21534 |       | n=42599 |       | n=20849 |       | n=21750 |       | n=42821 |       | n=21001 |       | n=21820 |       | n=40722 |       | n=20220 |       | n=20502 |       |
|           | n       | rate  |
| 0-9       | 14      | 0,4   | 7       | 0,3   | 7       | 0,4   | 15      | 0,4   | 7       | 0,3   | 8       | 0,4   | 33      | 0,8   | 20      | 1,0   | 13      | 0,7   | 37      | 0,9   | 19      | 0,9   | 18      | 0,9   |
| 10-19     | 120     | 3,1   | 61      | 3,1   | 59      | 3,1   | 107     | 2,8   | 57      | 2,9   | 50      | 2,7   | 121     | 3,2   | 56      | 2,9   | 65      | 3,6   | 124     | 3,3   | 52      | 2,7   | 72      | 4,0   |
| 20-29     | 267     | 4,9   | 168     | 6,1   | 99      | 3,7   | 288     | 5,5   | 164     | 6,1   | 124     | 4,8   | 278     | 5,5   | 156     | 6,1   | 122     | 4,9   | 307     | 6,3   | 184     | 7,4   | 123     | 5,1   |
| 30-39     | 806     | 12,8  | 559     | 17,5  | 247     | 7,9   | 905     | 14,3  | 618     | 19,2  | 287     | 9,2   | 962     | 15,2  | 707     | 22,0  | 255     | 8,2   | 921     | 14,6  | 651     | 20,4  | 270     | 8,7   |
| 40-49     | 2432    | 49,1  | 1751    | 70,2  | 681     | 27,7  | 2543    | 50,2  | 1790    | 70,2  | 753     | 29,9  | 2575    | 49,5  | 1859    | 71,0  | 716     | 27,7  | 2398    | 44,9  | 1691    | 62,9  | 707     | 26,6  |
| 50-59     | 7364    | 136,2 | 4611    | 175,0 | 2753    | 99,3  | 7243    | 138,1 | 4606    | 179,9 | 2637    | 98,2  | 6709    | 131,8 | 4257    | 171,1 | 2452    | 94,2  | 6025    | 122,3 | 3865    | 160,2 | 2160    | 85,9  |
| 60-69     | 11972   | 257,9 | 6375    | 301,2 | 5597    | 211,5 | 12995   | 265,8 | 7147    | 320,3 | 5848    | 220,1 | 12758   | 253,9 | 7079    | 308,1 | 5679    | 208,3 | 12235   | 238,6 | 6991    | 297,7 | 5244    | 188,7 |
| 70-79     | 10105   | 425,3 | 3788    | 406,4 | 6317    | 437,5 | 10167   | 433,1 | 4020    | 434,6 | 6147    | 432,1 | 10567   | 436,9 | 4291    | 446,3 | 6276    | 430,7 | 10324   | 409,1 | 4309    | 425,5 | 6015    | 398,0 |
| 80+       | 8195    | 536,0 | 2421    | 518,2 | 5774    | 543,8 | 8336    | 531,9 | 2440    | 507,4 | 5896    | 542,8 | 8818    | 547,1 | 2576    | 518,7 | 6242    | 559,7 | 8351    | 508,5 | 2458    | 484,0 | 5893    | 519,4 |

| Age group | 2018    |       |         |       |         |       | 2019    |       |         |       |         |       | 2020    |       |         |       |         |       | Percentage difference (2019-2020) |       |       |       |         |       |
|-----------|---------|-------|---------|-------|---------|-------|---------|-------|---------|-------|---------|-------|---------|-------|---------|-------|---------|-------|-----------------------------------|-------|-------|-------|---------|-------|
|           | Overall |       | Males   |       | Females |       | Overall |       | Males   |       | Females |       | Overall |       | Males   |       | Females |       | Overall                           |       | Males |       | Females |       |
|           | n=39904 |       | n=19961 |       | n=19943 |       | n=38138 |       | n=19322 |       | n=18816 |       | n=23568 |       | n=12484 |       | n=11084 |       | n                                 |       | n     |       | n       |       |
|           | n       | rate  | n                                 | rate  | n     | rate  | n       | rate  |
| 0-9       | 37      | 0,9   | 14      | 0,7   | 23      | 1,2   | 44      | 1,1   | 18      | 0,9   | 26      | 1,4   | 40      | 1,0   | 22      | 1,1   | 18      | 1,0   | -9,1                              | -7,8  | 22,2  | 24,0  | -30,8   | -29,8 |
| 10-19     | 125     | 3,3   | 73      | 3,8   | 52      | 2,8   | 152     | 4,0   | 66      | 3,4   | 86      | 4,6   | 117     | 3,0   | 54      | 2,7   | 63      | 3,3   | -23,0                             | -23,8 | -18,2 | -19,0 | -26,7   | -27,5 |
| 20-29     | 304     | 6,5   | 170     | 7,1   | 134     | 5,8   | 281     | 6,2   | 156     | 6,7   | 125     | 5,6   | 183     | 4,2   | 109     | 4,9   | 74      | 3,5   | -34,9                             | -32,4 | -30,1 | -27,4 | -40,8   | -38,5 |
| 30-39     | 949     | 15,2  | 683     | 21,6  | 266     | 8,6   | 981     | 16,0  | 688     | 22,1  | 293     | 9,7   | 606     | 10,0  | 444     | 14,5  | 162     | 5,4   | -38,2                             | -37,2 | -35,5 | -34,4 | -44,7   | -43,8 |
| 40-49     | 2387    | 43,5  | 1732    | 62,8  | 655     | 24,1  | 2361    | 41,9  | 1715    | 60,5  | 646     | 23,1  | 1422    | 24,7  | 1057    | 36,4  | 365     | 12,7  | -39,8                             | -41,2 | -38,4 | -39,8 | -43,5   | -44,9 |
| 50-59     | 5610    | 117,3 | 3630    | 154,8 | 1980    | 81,2  | 5043    | 108,0 | 3293    | 143,6 | 1750    | 73,6  | 3150    | 68,4  | 2163    | 95,5  | 987     | 42,2  | -37,5                             | -36,7 | -34,3 | -33,5 | -43,6   | -42,7 |
| 60-69     | 11806   | 227,5 | 6774    | 284,6 | 5032    | 179,2 | 11188   | 214,4 | 6541    | 272,7 | 4647    | 164,7 | 6751    | 130,2 | 4122    | 173,0 | 2629    | 93,8  | -39,7                             | -39,3 | -37,0 | -36,6 | -43,4   | -43,1 |
| 70-79     | 10399   | 391,9 | 4389    | 408,5 | 6010    | 380,6 | 10062   | 360,3 | 4397    | 385,9 | 5665    | 342,6 | 6530    | 222,8 | 3047    | 253,9 | 3483    | 201,3 | -35,1                             | -38,1 | -30,7 | -34,2 | -38,5   | -41,2 |
| 80+       | 8287    | 497,5 | 2496    | 483,1 | 5791    | 504,0 | 8026    | 474,4 | 2448    | 464,8 | 5578    | 478,8 | 4769    | 283,2 | 1466    | 280,7 | 3303    | 284,3 | -40,6                             | -40,3 | -40,1 | -39,6 | -40,8   | -40,6 |
